# Supplementary material for: Methylation-blocked enzymatic recycling amplification for highly sensitive fluorescence sensing of DNA methyltransferase activity
Source: Royal Society of Chemistry journal article supplement (doi:10.1039/c2an36329a), 2012-10-19
Supplement: c2an36329a.pdf [file c2an36329a.pdf]

## **Electronic Supplementary Information (ESI) for**

### **Methylation-blocked enzymatic recycling amplification for highly sensitive fluorescence sensing of DNA methyltransferase activity**

Feng Chen and Yongxi Zhao\*

Key Laboratory of Biomedical Information Engineering of Education Ministry,  
School of Life Science and Technology, Xi'an Jiaotong University, Xi'an, Shaanxi  
710049, P. R. China

\* To whom correspondence should be addressed. Phone/Fax: +86 29 82663454.

E-mail: yxzhao@mail.xjtu.edu.cn (Y-X Zhao)

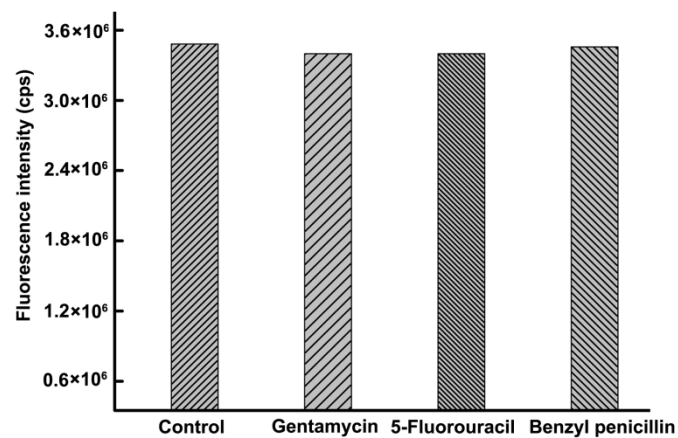

Fig. S1 Influence of different drugs on the activity of Nt.AlwI (5 U). The concentrations of gentamycin, 5-fluorouracil and benzyl penicillin are 38, 1000 and 50  $\mu$ M, respectively.
